# Supplementary material for: Photoinduced electron transfer in aqueous carbon nanotube/block copolymer/CdS hybrids: application in the construction of photoelectrochemical cells
Source: Royal Society of Chemistry journal article supplement (doi:10.1039/b914914g), 2009-01-01
Supplement: b914914g.pdf [file b914914g.pdf]

# Supplementary Information

## Photoinduced Electron Transfer in Aqueous Carbon Nanotubes/Block Copolymer/CdS Hybrids: Application in the Construction of Photoelectrochemical Cells

Grigoris Mountrichas,<sup>a</sup> Atula S. D. Sandanayaka<sup>b, c</sup> Solon P. Economopoulos,<sup>a</sup> Stergios Pispas,<sup>a</sup> Osamu Ito,  
\*<sup>b</sup> Taku Hasobe, \*<sup>c, d</sup> and Nikos Tagmatarchis\*<sup>a</sup>

<sup>a</sup> *Theoretical and Physical Chemistry Institute, National Hellenic Research Foundation, 48 Vass.*

*Constantinou Avenue, 11635 Athens, Greece. Fax: +30210-7273794; Tel: +30210-7273835; E-mail: tagmatar@eie.gr*

<sup>b</sup> *Address, Address, Town, Country Institute of Multidisciplinary Research for Advanced Materials, Tohoku University, Katahira, Aoba-ku, Sendai, 980-8577 Japan.*

<sup>c</sup> *School of Materials Science, Japan Advanced Institute of Science and Technology (JAIST), Nomi, Ishikawa 923 1292 Japan.*

<sup>d</sup> *PRESTO, Japan Science and Technology Agency (JST), 4-1-8 Honcho, Kawaguchi, Saitama, 332-0012 Japan*

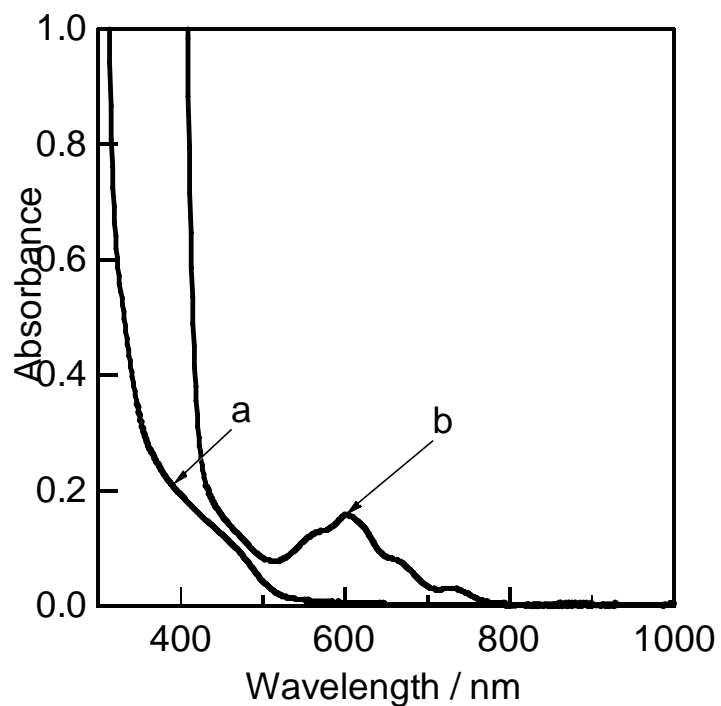

**Figure S1.** Steady-state absorption spectral changes of an Ar-saturated aqueous solution of CSI/CdS, after the repeated irradiation of 355-nm laser light (ca. 3 mJ/pulse) in the presence of 0.5 mM of  $MV^{2+}$  and added concentrations of BNAH (a) 0 mM, and (b) 3.0 mM, respectively. Each of the maximal absorbance is depicted after 20 times of laser light irradiation.

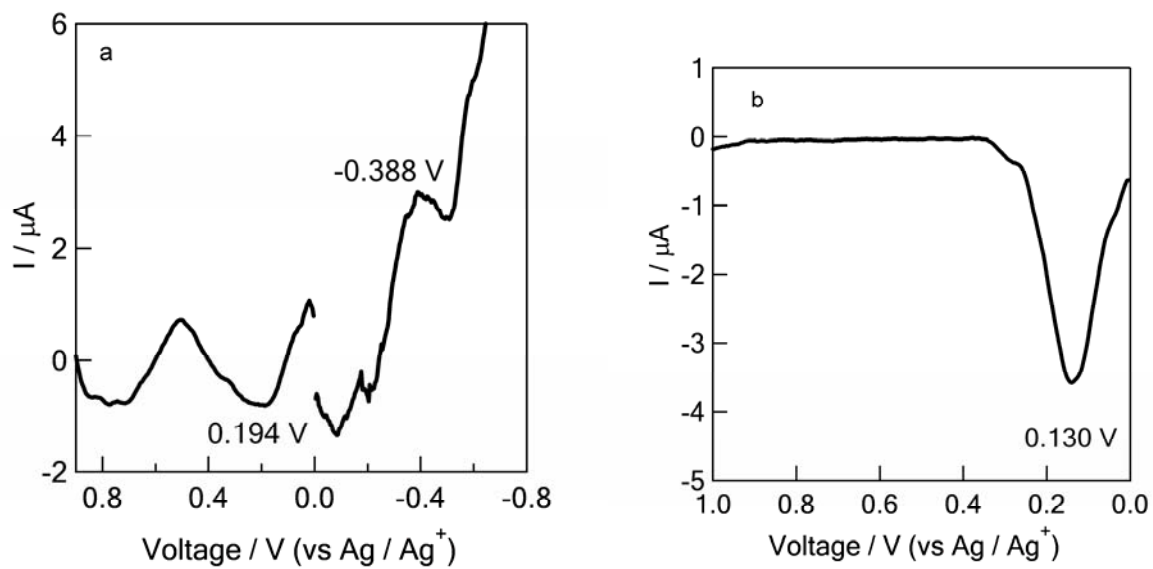

**Figure S2.** Differential pulse voltamogram of pMWCNTs/CSI/CdS (a) and CSI/CdS (b) obtained in aqueous solution (scan rate: 100 mV/sec).
